# Supplementary material for: Effect of vitamin C injections on exercise muscular performance and biochemical parameters in Trichinella spiralis-infected mice
Source: PeerJ. 2024 Nov 13;12:e18381. doi: 10.7717/peerj.18381 (PMC11568815; doi:10.7717/peerj.18381)
Supplement: Supplemental Information 2 [file peerj-12-18381-s002.xlsx]

## Sheet: Body weight
		Uninfected+saline							Infected+Saline							Infected+vitamin C
	no	first week	second week	%change	Third week	%change	fourth week	%change	first week	second week	%change	Third week	%change	fourth week	%change	first week	second week	%change	Third week	%change	fourth week	%Change
	1	17.5	16.5	-6.06061	13	-34.6154	15	-16.6667	16	15	-6.66667	17.5	8.57143	16.5	3.0303	15	15.3	1.96078	16	6.25	15	0
	2	20	20.5	2.43902	19.5	-2.5641	24	16.6667	21	19	-10.5263	18.3	-14.7541	17.5	-20	15	15	0	18	16.6667	17	11.7647
	3	16	20	20	18	11.1111	21.5	25.5814	15	14.5	-3.44828	15.5	3.22581	15.5	3.22581	15	15	0	16	6.25	18.1	17.1271
	4	19	19	0	17.6	-7.95455	20	5	15	15	0	17.5	14.2857	19	21.0526	15	15.2	1.31579	16.6	9.63855	16	6.25
	5	21	20.5	-2.43902	16.5	-27.2727	19	-10.5263	15	14	-7.14286	15.7	4.4586	14.5	-3.44828	15	15	0	16	6.25	18	16.6667
	6	20.5	20.7	0.966184	19	-7.89474	21.5	4.65116	25	22	-13.6364	22	-13.6364	21	-19.0476	16	16.4	2.43902	19	15.7895	18.5	13.5135
	7	19.5	20	2.5	15	-30	20.5	4.87805	23	20.1	-14.4279	20.4	-12.7451	19	-21.0526	15	15.3	1.96078	18.5	18.9189	17.5	14.2857
	8	17	17.5	2.85714	15.5	-9.67742	17.5	2.85714	14.9	14.5	-2.75862	13.6	-9.55882	12	-24.1667	20	20.5	2.43902	23	13.0435	22	9.09091
	9	18.5	19.4	4.63918	19.5	5.12821	22	15.9091	21.6	18.5	-16.7568	17.5	-23.4286	16	-35	15	15.7	4.4586	17	11.7647	17	11.7647
	10	18.2	19.2	5.20833	17	-7.05882	19	4.21053	14.5	14	-3.57143	15	3.33333	14	-3.57143	17.6	19.5	9.74359	22	20	21.5	18.1395

## Sheet: Muscle strength
	Uninfected+saline		Infected+Saline		Infected+vitamin C
No	1st week	2nd week	1st week	2nd week	1st week	2nd week
1	21	35	21	12	21	18
2	21	33	21	10	21	30
3	21	33	21	11	21	31.5
4	21	30.5	21	21	21	31
5	21	33	21	26	21	29
6	21	15	21	11	21	30
7	21	26.5	21	26	21	26
8	21	15	21	12	21	30
9	21	35	21	24	21	20.5
10	21	34	21	12	21	19.5

## Sheet: Time latency to fall (Wire hang
	Uninfected+saline		Infected+Saline		Infected+vitamin C
No	Pre-tretment	Post-treatment	Pre-treatment	Post-treatment	Pre-treatment	Post-treatment
1	26	25	26	7	22	22.5
2	14	24	18	16	11.5	23
3	27	22.5	15	15	21	18
4	21	30	27	6	22.5	18.4
5	30	31	33	5	18	22.4
6	25.5	25	23	6	25	22.5
7	25.5	15.5	21	8	26.5	24.5
8	11	15	33	9	17.5	17.5
9	13	15	29	9	14.5	25
10	31	31	11	5	18	22

## Sheet: Larvae counting
	Uninfected+saline												Infected+ vitamin C
	Masseter			Triceps			Gastrocnemius			Rib cage			Masseter			Triceps			Gastrocnemius			Rib cage
No	El 1	NBL 1	Total	El 2	NBL 2	Total	El 3	NBL 3	Total	El 4	NBL 4	Total	El 1	NBL1	Total	El 2	NBL2	Total	El 3	NBL 3	total	El 4	NBL 4	Total
1	10	26	36	9	25	34	11	26	37	7	20	27	1	22	23	4	11	15	1	8	9	4	15	19
2	10	26	36	11	26	37	9	26	35	11	21	32	1	24	25	2	11	13	1	11	12	3	13	16
3	10	37	47	13	34	47	9	25	34	9	21	30	1	18	19	1	10	11	1	11	12	4	14	18
4	11	35	46	10	27	37	10	27	37	12	33	45	3	20	23	2	10	12	3	10	13	2	14	16
5	10	38	48	10	35	45	10	30	40	10	30	40	5	13	18	3	8	11	2	12	14	3	12	15
6	11	35	46	12	25	37	10	27	37	8	21	29	4	18	22	2	10	12	2	12	14	5	15	20
7	10	35	45	11	30	41	9	27	36	11	31	42	3	20	23	2	11	13	2	10	12	5	16	21
8	10	31	41	12	34	46	11	25	36	9	22	31	3	18	21	2	9	11	2	10	12	3	14	17
9	9	30	39	10	26	36	10	23	33	10	21	31	5	20	25	4	10	14	1	11	12	4	15	19
10	11	33	44	10	30	40	9	28	37	9	22	31	1	21	22	2	11	13	1	11	12	4	15	19
																								18±0.79

## Sheet: encysted larvae type
	Infected+Saline			Infected+vitamin C
No	Intact	Deformed	Vacuolated	Intact	Deformed	Vacuolated
1	26	5	1	10	10	9
2	30	6	2	13	7	9
3	20	8	5	9	10	6
4	27	9	3	10	11	8
5	33	9	3	9	12	9
6	27	4	3	12	10	8
7	27	7	1	9	14	6
8	33	7	3	11	13	8
9	29	9	4	9	13	9
10	20	8	5	13	10	8

## Sheet: histological lesions
no	Infected+Saline					Infected+vitamin C
	Fibrosis	Cellular infiltration	Nurse cell	Vacuolation	Muscular destruction	Fibrosis	Cellular infiltration	Nurse cell	Vacuolation	Muscular destruction
1	2	2	3	2	2	1	2	1	2	1
2	1	2	3	1	3	1	1	1	1	1
3	2	1	2	1	2	2	1	1	1	1
4	2	2	2	1	2	1	1	1	1	1
5	2	1	2	2	2	2	1	1	1	2
6	1	2	2	1	2	1	1	1	1	2
7	1	2	1	1	1	2	1	2	1	2
8	2	2	1	2	3	1	1	1	1	2
9	2	1	1	1	2	1	1	1	1	1
10	2	1	2	1	3	2	1	1	1	2

## Sheet: biomarkers
no	Uninfected+ saline					Infected+Saline					Infected+vitamin C
	Ck	AST	SoD	CAT	MDA	Ck	AST	SoD	CAT	MDA	Ck	AST	SoD	CAT	MDA
1	60	10	1.61	3.97	0.46	112.4	25.3	1.07	2.79	0.77	83.8	17.6	1.31	3.41	0.59
2	63.7	13.8	1.56	3.86	0.47	108.9	23.9	1.11	2.83	0.77	84.5	18.1	1.28	3.37	0.6
3	61	11	1.58	3.92	0.47	106.1	22.3	1.14	2.88	0.76	80.5	16.5	1.34	3.46	0.59
4	62.7	11.2	1.63	3.9	0.46	110.3	24.5	1.08	2.85	0.78	83.9	16.5	1.29	3.44	0.59
5	61.6	10	1.59	3.93	0.47	112.2	24.3	1.09	2.83	0.78	83.6	17.3	1.3	3.39	0.57
6	60.5	12.4	1.5	3.8	0.47	110	23.8	1.12	2.87	0.76	84.3	17.4	1.33	3.42	0.61
7	61.5	13.2	1.6	3.9	0.46	108.5	23.9	1.13	2.82	0.75	81.4	18.2	1.34	3.38	0.58
8	63	11.3	1.6	3.97	0.46	109	24.4	1.14	2.81	0.79	83.6	17.2	1.28	3.46	0.62
9	62.2	11.8	1.57	3.91	0.45	108.2	25.3	1.09	2.79	0.77	84.5	17.6	1.27	3.35	0.59
10	63.1	12.3	1.59	3.96	0.48	106.1	22	1.14	2.83	0.78	83.9	18.6	1.34	3.4	0.59
